# Supplementary material for: Observation of a double C–H⋯π interaction in the CH2ClF⋯HCCH weakly bound complex
Source: Royal Society of Chemistry journal article supplement (doi:10.1039/c1cp20684b), 2011-01-01
Supplement: c1cp20684b.pdf [file c1cp20684b.pdf]

**Table S1.** Fitted transition frequencies for CH<sub>2</sub><sup>35</sup>ClF-H<sup>12</sup>C<sup>12</sup>CH.

| $J'$ | $K_a'$ | $K_c'$ | $F'+1/2$ | $J''$ | $K_a''$ | $K_c''$ | $F''+1/2$ | Obs. Freq.<br>/ MHz | Obs. - Calc.<br>Freq. / MHz |
|------|--------|--------|----------|-------|---------|---------|-----------|---------------------|-----------------------------|
| 3    | 1      | 3      | 4        | 2     | 1       | 2       | 4         | 7722.8710           | 0.0015                      |
| 3    | 1      | 3      | 2        | 2     | 1       | 2       | 1         | 7727.7098           | 0.0023                      |
| 3    | 1      | 3      | 3        | 2     | 1       | 2       | 2         | 7729.1439           | -0.0001                     |
| 3    | 1      | 3      | 5        | 2     | 1       | 2       | 4         | 7730.6938           | -0.0013                     |
| 3    | 1      | 3      | 3        | 2     | 1       | 2       | 3         | 7735.7857           | -0.0055                     |
| 3    | 1      | 3      | 2        | 2     | 1       | 2       | 2         | 7736.9967           | 0.0008                      |
| 4    | 0      | 4      | 3        | 3     | 1       | 3       | 2         | 7820.5190           | 0.0012                      |
| 4    | 0      | 4      | 6        | 3     | 1       | 3       | 5         | 7824.9761           | 0.0030                      |
| 4    | 0      | 4      | 4        | 3     | 1       | 3       | 3         | 7830.5523           | 0.0049                      |
| 4    | 0      | 4      | 5        | 3     | 1       | 3       | 4         | 7834.9561           | 0.0016                      |
| 3    | 0      | 3      | 3        | 2     | 0       | 2       | 3         | 8163.8380           | 0.0009                      |
| 3    | 0      | 3      | 4        | 2     | 0       | 2       | 3         | 8165.8320           | 0.0010                      |
| 3    | 0      | 3      | 5        | 2     | 0       | 2       | 4         | 8167.5213           | -0.0027                     |
| 3    | 0      | 3      | 3        | 2     | 0       | 2       | 2         | 8168.0908           | 0.0029                      |
| 3    | 0      | 3      | 2        | 2     | 0       | 2       | 1         | 8169.7786           | 0.0025                      |
| 3    | 0      | 3      | 4        | 2     | 0       | 2       | 4         | 8171.8165           | -0.0028                     |
| 3    | 2      | 2      | 2        | 2     | 2       | 1       | 1         | 8248.9037           | -0.0069                     |
| 3    | 2      | 2      | 5        | 2     | 2       | 1       | 4         | 8254.0017           | -0.0053                     |
| 3    | 2      | 2      | 3        | 2     | 2       | 1       | 2         | 8256.0379           | -0.0057                     |
| 3    | 2      | 2      | 4        | 2     | 2       | 1       | 3         | 8261.1219           | -0.0031                     |
| 3    | 2      | 1      | 2        | 2     | 2       | 0       | 1         | 8336.9117           | -0.0007                     |
| 3    | 2      | 1      | 5        | 2     | 2       | 0       | 4         | 8342.4860           | -0.0048                     |
| 3    | 2      | 1      | 3        | 2     | 2       | 0       | 2         | 8345.6900           | -0.0026                     |
| 3    | 2      | 1      | 3        | 2     | 2       | 0       | 3         | 8349.9609           | -0.0049                     |
| 3    | 2      | 1      | 4        | 2     | 2       | 0       | 3         | 8351.3101           | -0.0004                     |
| 3    | 1      | 2      | 2        | 2     | 1       | 1       | 2         | 8739.5309           | 0.0043                      |
| 3    | 1      | 2      | 3        | 2     | 1       | 1       | 3         | 8745.5829           | 0.0041                      |
| 3    | 1      | 2      | 5        | 2     | 1       | 1       | 4         | 8752.5079           | 0.0064                      |
| 3    | 1      | 2      | 4        | 2     | 1       | 1       | 3         | 8753.9133           | 0.0088                      |
| 3    | 1      | 2      | 2        | 2     | 1       | 1       | 1         | 8755.9084           | 0.0095                      |
| 2    | 1      | 2      | 3        | 1     | 0       | 1       | 2         | 8867.1387           | -0.0090                     |
| 2    | 1      | 2      | 2        | 1     | 0       | 1       | 2         | 8873.7832           | -0.0117                     |
| 2    | 1      | 2      | 3        | 1     | 0       | 1       | 3         | 8874.2635           | -0.0059                     |
| 2    | 1      | 2      | 4        | 1     | 0       | 1       | 3         | 8883.5259           | -0.0003                     |
| 2    | 1      | 2      | 2        | 1     | 0       | 1       | 1         | 8886.6214           | 0.0015                      |
| 2    | 1      | 2      | 1        | 1     | 0       | 1       | 1         | 8895.9069           | -0.0014                     |
| 4    | 1      | 4      | 3        | 3     | 1       | 3       | 2         | 10282.4324          | 0.0024                      |
| 4    | 1      | 4      | 4        | 3     | 1       | 3       | 3         | 10282.6616          | 0.0031                      |
| 4    | 1      | 4      | 6        | 3     | 1       | 3       | 5         | 10283.4335          | 0.0035                      |
| 4    | 1      | 4      | 5        | 3     | 1       | 3       | 4         | 10283.6520          | 0.0058                      |
| 4    | 0      | 4      | 4        | 3     | 0       | 3       | 3         | 10789.1261          | -0.0029                     |
| 4    | 0      | 4      | 6        | 3     | 0       | 3       | 5         | 10790.0115          | -0.0053                     |
| 4    | 0      | 4      | 3        | 3     | 0       | 3       | 2         | 10791.2538          | 0.0007                      |
| 4    | 0      | 4      | 5        | 3     | 0       | 3       | 5         | 10792.1690          | -0.0036                     |
| 5    | 0      | 5      | 4        | 4     | 1       | 4       | 3         | 10877.2781          | -0.0125                     |
| 5    | 0      | 5      | 7        | 4     | 1       | 4       | 6         | 10879.9333          | -0.0076                     |
| 5    | 0      | 5      | 5        | 4     | 1       | 4       | 4         | 10884.6979          | -0.0089                     |
| 5    | 0      | 5      | 6        | 4     | 1       | 4       | 5         | 10887.2751          | -0.0133                     |
| 4    | 2      | 3      | 3        | 3     | 2       | 2       | 2         | 10988.3858          | 0.0053                      |
| 4    | 2      | 3      | 6        | 3     | 2       | 2       | 5         | 10989.3223          | 0.0014                      |
| 4    | 2      | 3      | 4        | 3     | 2       | 2       | 3         | 10991.0126          | 0.0049                      |
| 4    | 2      | 3      | 5        | 3     | 2       | 2       | 4         | 10991.8791          | 0.0043                      |
| 3    | 1      | 3      | 4        | 2     | 0       | 2       | 3         | 11118.7574          | 0.0036                      |
| 3    | 1      | 3      | 3        | 2     | 0       | 2       | 2         | 11126.6705          | 0.0012                      |
| 3    | 1      | 3      | 5        | 2     | 0       | 2       | 4         | 11132.5626          | -0.0051                     |
| 3    | 1      | 3      | 2        | 2     | 0       | 2       | 2         | 11134.5293          | 0.0079                      |
| 3    | 1      | 3      | 2        | 2     | 0       | 2       | 1         | 11140.5030          | -0.0085                     |
| 4    | 2      | 2      | 3        | 3     | 2       | 1       | 2         | 11205.8125          | -0.0061                     |
| 4    | 2      | 2      | 6        | 3     | 2       | 1       | 5         | 11207.1600          | -0.0018                     |
| 4    | 2      | 2      | 4        | 3     | 2       | 1       | 4         | 11209.2088          | -0.0020                     |
| 4    | 2      | 2      | 4        | 3     | 2       | 1       | 3         | 11210.5470          | -0.0085                     |
| 4    | 2      | 2      | 5        | 3     | 2       | 1       | 4         | 11211.8631          | -0.0017                     |
| 4    | 1      | 3      | 6        | 3     | 1       | 2       | 5         | 11642.2435          | 0.0078                      |
| 4    | 1      | 3      | 5        | 3     | 1       | 2       | 4         | 11642.3680          | 0.0081                      |
| 4    | 1      | 3      | 3        | 3     | 1       | 2       | 2         | 11644.2901          | 0.0025                      |
| 4    | 1      | 3      | 4        | 3     | 1       | 2       | 3         | 11644.3887          | 0.0082                      |
| 4    | 1      | 4      | 6        | 3     | 0       | 3       | 5         | 13248.4721          | -0.0016                     |
| 5    | 0      | 5      | 6        | 4     | 0       | 4       | 5         | 13335.9867          | 0.0066                      |
| 5    | 0      | 5      | 5        | 4     | 0       | 4       | 4         | 13336.8193          | 0.0014                      |
| 5    | 0      | 5      | 7        | 4     | 0       | 4       | 6         | 13338.4060          | 0.0083                      |
| 5    | 0      | 5      | 4        | 4     | 0       | 4       | 3         | 13339.2130          | 0.0102                      |

**Table S2.** Fitted transition frequencies for CH<sub>2</sub><sup>37</sup>ClF-H<sup>12</sup>C<sup>12</sup>CH.

| $J'$ | $K_a'$ | $K_c'$ | $F' + 1/2$ | $J''$ | $K_a''$ | $K_c''$ | $F'' + 1/2$ | Obs. Freq.<br>/ MHz | Obs. - Calc.<br>Freq. / MHz |
|------|--------|--------|------------|-------|---------|---------|-------------|---------------------|-----------------------------|
| 3    | 1      | 3      | 4          | 2     | 1       | 2       | 4           | 7658.1570           | 0.0084                      |
| 3    | 1      | 3      | 3          | 2     | 1       | 2       | 2           | 7663.1065           | 0.0026                      |
| 3    | 1      | 3      | 3          | 2     | 1       | 2       | 3           | 7668.3396           | 0.0049                      |
| 3    | 0      | 3      | 4          | 2     | 0       | 2       | 3           | 8100.8261           | 0.0061                      |
| 3    | 0      | 3      | 3          | 2     | 0       | 2       | 2           | 8102.6056           | 0.0037                      |
| 3    | 0      | 3      | 5          | 2     | 0       | 2       | 4           | 8102.2059           | 0.0065                      |
| 3    | 0      | 3      | 2          | 2     | 0       | 2       | 1           | 8103.9854           | 0.0069                      |
| 3    | 0      | 3      | 4          | 2     | 0       | 2       | 4           | 8105.4482           | -0.0095                     |
| 3    | 2      | 2      | 2          | 2     | 2       | 1       | 1           | 8189.4832           | 0.0048                      |
| 3    | 2      | 2      | 5          | 2     | 2       | 1       | 4           | 8193.4622           | 0.0014                      |
| 3    | 2      | 2      | 3          | 2     | 2       | 1       | 2           | 8195.0461           | -0.0064                     |
| 3    | 2      | 2      | 4          | 2     | 2       | 1       | 3           | 8199.0245           | 0.0009                      |
| 3    | 2      | 1      | 5          | 2     | 2       | 0       | 4           | 8286.3727           | -0.0057                     |
| 3    | 2      | 1      | 3          | 2     | 2       | 0       | 2           | 8288.9227           | -0.0018                     |
| 3    | 2      | 1      | 4          | 2     | 2       | 0       | 3           | 8293.3303           | 0.0045                      |
| 3    | 1      | 2      | 2          | 2     | 1       | 1       | 2           | 8685.6349           | -0.0063                     |
| 3    | 1      | 2      | 3          | 2     | 1       | 1       | 3           | 8690.3871           | 0.0082                      |
| 3    | 1      | 2      | 5          | 2     | 1       | 1       | 4           | 8695.8195           | 0.0002                      |
| 3    | 1      | 2      | 4          | 2     | 1       | 1       | 3           | 8696.8985           | -0.0029                     |
| 3    | 1      | 2      | 2          | 2     | 1       | 1       | 1           | 8698.4983           | 0.0032                      |
| 3    | 1      | 2      | 3          | 2     | 1       | 1       | 2           | 8699.5861           | -0.0018                     |
| 4    | 0      | 4      | 4          | 3     | 0       | 3       | 4           | 10696.0936          | -0.0061                     |
| 4    | 0      | 4      | 5          | 3     | 0       | 3       | 4           | 10696.6195          | -0.0048                     |
| 4    | 0      | 4      | 4          | 3     | 0       | 3       | 3           | 10697.6052          | -0.0083                     |
| 4    | 0      | 4      | 6          | 3     | 0       | 3       | 5           | 10698.3595          | -0.0022                     |
| 4    | 0      | 4      | 3          | 3     | 0       | 3       | 2           | 10699.3328          | -0.0078                     |
| 4    | 0      | 4      | 5          | 3     | 0       | 3       | 5           | 10699.8817          | -0.0008                     |
| 4    | 2      | 3      | 3          | 3     | 2       | 2       | 3           | 10906.6308          | -0.0030                     |
| 4    | 2      | 3      | 6          | 3     | 2       | 2       | 5           | 10907.3708          | -0.0037                     |
| 4    | 2      | 3      | 4          | 3     | 2       | 2       | 4           | 10908.7088          | 0.0092                      |
| 4    | 2      | 3      | 5          | 3     | 2       | 2       | 4           | 10909.3558          | -0.0026                     |
| 4    | 1      | 4      | 5          | 3     | 1       | 3       | 4           | 10193.9901          | 0.0102                      |
| 4    | 1      | 4      | 6          | 3     | 1       | 3       | 5           | 10193.8232          | -0.0029                     |
| 4    | 1      | 4      | 3          | 3     | 1       | 3       | 2           | 10193.0374          | -0.0065                     |
| 4    | 1      | 4      | 4          | 3     | 1       | 3       | 3           | 10193.1959          | -0.0103                     |
| 4    | 1      | 3      | 6          | 3     | 1       | 2       | 5           | 11564.9599          | 0.0024                      |
| 5    | 0      | 5      | 6          | 4     | 0       | 4       | 5           | 13216.0592          | -0.0002                     |
| 5    | 0      | 5      | 5          | 4     | 0       | 4       | 4           | 13216.7195          | 0.0002                      |
| 5    | 0      | 5      | 7          | 4     | 0       | 4       | 6           | 13218.0209          | 0.0130                      |

**Table S3.** Fitted transition frequencies for CH<sub>2</sub><sup>35</sup>ClF-H<sup>13</sup>C<sup>13</sup>CH.

| $J'$ | $K_a'$ | $K_c'$ | $F' + 1/2$ | $J''$ | $K_a''$ | $K_c''$ | $F'' + 1/2$ | Obs. Freq.<br>/ MHz | Obs. - Calc.<br>Freq. / MHz |
|------|--------|--------|------------|-------|---------|---------|-------------|---------------------|-----------------------------|
| 1    | 1      | 1      | 2          | 0     | 0       | 0       | 2           | 6374.2462           | -0.0022                     |
| 1    | 1      | 1      | 3          | 0     | 0       | 0       | 2           | 6390.6070           | 0.0031                      |
| 1    | 1      | 1      | 1          | 0     | 0       | 0       | 2           | 6403.7166           | -0.0028                     |
| 3    | 0      | 3      | 2          | 2     | 0       | 2       | 2           | 7807.1130           | 0.0030                      |
| 3    | 0      | 3      | 3          | 2     | 0       | 2       | 3           | 7807.3264           | -0.0014                     |
| 3    | 0      | 3      | 4          | 2     | 0       | 2       | 3           | 7809.4197           | -0.0029                     |
| 3    | 0      | 3      | 5          | 2     | 0       | 2       | 4           | 7810.9706           | -0.0002                     |
| 3    | 0      | 3      | 3          | 2     | 0       | 2       | 2           | 7811.6328           | 0.0067                      |
| 3    | 0      | 3      | 2          | 2     | 0       | 2       | 1           | 7813.1680           | -0.0001                     |
| 3    | 0      | 3      | 4          | 2     | 0       | 2       | 4           | 7815.4797           | -0.0028                     |
| 3    | 1      | 3      | 2          | 2     | 1       | 2       | 1           | 7400.3893           | -0.0031                     |
| 3    | 1      | 3      | 3          | 2     | 1       | 2       | 2           | 7401.8488           | -0.0007                     |
| 3    | 1      | 3      | 5          | 2     | 1       | 2       | 4           | 7403.3902           | 0.0007                      |
| 3    | 1      | 3      | 4          | 2     | 1       | 2       | 3           | 7404.8384           | -0.0033                     |
| 3    | 1      | 2      | 5          | 2     | 1       | 1       | 4           | 8342.8632           | -0.0006                     |
| 3    | 1      | 2      | 4          | 2     | 1       | 1       | 3           | 8344.2930           | -0.0015                     |
| 3    | 1      | 2      | 2          | 2     | 1       | 1       | 1           | 8346.2369           | -0.0035                     |
| 3    | 1      | 2      | 3          | 2     | 1       | 1       | 2           | 8347.6889           | 0.0028                      |
| 2    | 1      | 2      | 3          | 1     | 0       | 1       | 2           | 8689.7408           | -0.0009                     |
| 2    | 1      | 2      | 2          | 1     | 0       | 1       | 2           | 8696.3877           | -0.0002                     |
| 2    | 1      | 2      | 4          | 1     | 0       | 1       | 3           | 8706.0871           | 0.0035                      |
| 2    | 1      | 2      | 2          | 1     | 0       | 1       | 1           | 8709.1537           | 0.0015                      |
| 2    | 1      | 2      | 1          | 1     | 0       | 1       | 1           | 8718.4364           | -0.0021                     |
| 4    | 1      | 4      | 3          | 3     | 1       | 3       | 2           | 9849.7575           | 0.0002                      |
| 4    | 1      | 4      | 4          | 3     | 1       | 3       | 3           | 9850.0214           | -0.0006                     |
| 4    | 1      | 4      | 6          | 3     | 1       | 3       | 5           | 9850.7664           | -0.0006                     |
| 4    | 1      | 4      | 5          | 3     | 1       | 3       | 4           | 9851.0204           | 0.0001                      |
| 4    | 0      | 4      | 5          | 3     | 0       | 3       | 4           | 10328.0847          | 0.0035                      |
| 4    | 0      | 4      | 4          | 3     | 0       | 3       | 3           | 10329.2993          | 0.0007                      |
| 4    | 0      | 4      | 6          | 3     | 0       | 3       | 5           | 10330.0520          | 0.0010                      |
| 4    | 0      | 4      | 3          | 3     | 0       | 3       | 2           | 10331.2573          | 0.0031                      |
| 4    | 2      | 3      | 3          | 3     | 2       | 2       | 2           | 10496.9368          | 0.0003                      |
| 4    | 2      | 3      | 6          | 3     | 2       | 2       | 5           | 10497.8701          | 0.0003                      |
| 4    | 2      | 3      | 4          | 3     | 2       | 2       | 3           | 10499.5556          | -0.0026                     |
| 4    | 2      | 2      | 5          | 3     | 2       | 2       | 4           | 10500.4473          | 0.0032                      |
| 4    | 2      | 2      | 6          | 3     | 2       | 1       | 5           | 10681.4201          | 0.0006                      |
| 4    | 2      | 2      | 4          | 3     | 2       | 1       | 3           | 10684.7145          | -0.0074                     |
| 4    | 2      | 2      | 5          | 3     | 2       | 1       | 4           | 10685.9401          | 0.0068                      |
| 5    | 1      | 5      | 5          | 4     | 1       | 4       | 4           | 12281.7254          | 0.0021                      |
| 5    | 1      | 5      | 4          | 4     | 1       | 4       | 3           | 12281.9028          | 0.0037                      |
| 5    | 1      | 5      | 6          | 4     | 1       | 4       | 5           | 12282.1837          | -0.0009                     |
| 5    | 1      | 5      | 7          | 4     | 1       | 4       | 6           | 12282.3772          | -0.0023                     |
| 5    | 0      | 5      | 6          | 4     | 0       | 4       | 5           | 12782.6443          | -0.0036                     |
| 5    | 0      | 5      | 5          | 4     | 0       | 4       | 4           | 12783.4670          | 0.0026                      |
| 5    | 0      | 5      | 7          | 4     | 0       | 4       | 6           | 12784.9064          | -0.0003                     |
| 5    | 0      | 5      | 4          | 4     | 0       | 4       | 3           | 12785.6954          | -0.0041                     |

**Table S4.** Fitted transition frequencies for CH<sub>2</sub><sup>37</sup>ClF-H<sup>13</sup>C<sup>13</sup>CH.

| $J'$ | $K_a'$ | $K_c'$ | $F' + 1/2$ | $J''$ | $K_a''$ | $K_c''$ | $F'' + 1/2$ | Obs. Freq.<br>/ MHz | Obs. - Calc.<br>Freq. / MHz |
|------|--------|--------|------------|-------|---------|---------|-------------|---------------------|-----------------------------|
| 1    | 1      | 1      | 2          | 0     | 0       | 0       | 2           | 6244.7563           | 0.0038                      |
| 1    | 1      | 1      | 3          | 0     | 0       | 0       | 2           | 6257.5672           | -0.0108                     |
| 1    | 1      | 1      | 1          | 0     | 0       | 0       | 2           | 6267.8662           | 0.0076                      |
| 3    | 1      | 3      | 4          | 2     | 1       | 2       | 4           | 7331.7976           | 0.0023                      |
| 3    | 1      | 3      | 2          | 2     | 1       | 2       | 1           | 7335.6219           | 0.0009                      |
| 3    | 1      | 3      | 3          | 2     | 1       | 2       | 2           | 7336.7437           | -0.0022                     |
| 3    | 1      | 3      | 5          | 2     | 1       | 2       | 4           | 7337.9715           | 0.0030                      |
| 3    | 1      | 3      | 4          | 2     | 1       | 2       | 3           | 7339.0906           | 0.0004                      |
| 3    | 1      | 3      | 3          | 2     | 1       | 2       | 3           | 7341.9770           | -0.0025                     |
| 3    | 0      | 3      | 2          | 2     | 0       | 2       | 2           | 7743.5893           | 0.0001                      |
| 3    | 0      | 3      | 3          | 2     | 0       | 2       | 3           | 7743.6874           | -0.0023                     |
| 3    | 0      | 3      | 4          | 2     | 0       | 2       | 3           | 7745.2797           | -0.0005                     |
| 3    | 0      | 3      | 5          | 2     | 0       | 2       | 4           | 7746.5354           | -0.0035                     |
| 3    | 0      | 3      | 3          | 2     | 0       | 2       | 2           | 7747.0117           | -0.0030                     |
| 3    | 0      | 3      | 2          | 2     | 0       | 2       | 1           | 7748.2624           | -0.0072                     |
| 3    | 0      | 3      | 4          | 2     | 0       | 2       | 4           | 7749.9603           | -0.0014                     |
| 3    | 1      | 2      | 2          | 2     | 1       | 1       | 2           | 8275.3820           | 0.0004                      |
| 3    | 1      | 2      | 3          | 2     | 1       | 1       | 3           | 8280.1222           | -0.0025                     |
| 3    | 1      | 2      | 5          | 2     | 1       | 1       | 4           | 8285.5382           | 0.0016                      |
| 3    | 1      | 2      | 4          | 2     | 1       | 1       | 3           | 8286.6396           | 0.0014                      |
| 3    | 1      | 2      | 2          | 2     | 1       | 1       | 1           | 8288.1972           | 0.0029                      |
| 3    | 1      | 2      | 3          | 2     | 1       | 1       | 2           | 8289.3023           | -0.0035                     |
| 3    | 1      | 2      | 4          | 2     | 1       | 1       | 4           | 8299.4802           | 0.0018                      |
| 4    | 1      | 4      | 3          | 3     | 1       | 3       | 2           | 9761.8202           | 0.0047                      |
| 4    | 1      | 4      | 4          | 3     | 1       | 3       | 3           | 9762.0125           | 0.0063                      |
| 4    | 1      | 4      | 6          | 3     | 1       | 3       | 5           | 9762.6129           | 0.0068                      |
| 4    | 1      | 4      | 5          | 3     | 1       | 3       | 4           | 9762.7957           | 0.0065                      |
| 4    | 0      | 4      | 5          | 3     | 0       | 3       | 4           | 10238.8293          | -0.0041                     |
| 4    | 0      | 4      | 4          | 3     | 0       | 3       | 3           | 10239.7906          | -0.0022                     |
| 4    | 0      | 4      | 6          | 3     | 0       | 3       | 5           | 10240.4277          | -0.0038                     |
| 4    | 0      | 4      | 3          | 3     | 0       | 3       | 2           | 10241.3792          | -0.0023                     |
| 4    | 2      | 3      | 6          | 3     | 2       | 2       | 5           | 10416.0950          | -0.0024                     |
| 4    | 2      | 3      | 5          | 3     | 2       | 2       | 5           | 10418.0985          | 0.0023                      |
| 4    | 2      | 2      | 6          | 3     | 2       | 1       | 5           | 10607.9977          | 0.0004                      |
| 4    | 2      | 2      | 4          | 3     | 2       | 1       | 3           | 10610.5907          | 0.0002                      |
| 4    | 2      | 2      | 5          | 3     | 2       | 1       | 4           | 10611.5783          | -0.0108                     |
| 4    | 1      | 3      | 6          | 3     | 1       | 2       | 5           | 11022.9714          | -0.0003                     |
| 4    | 1      | 3      | 5          | 3     | 1       | 2       | 4           | 11023.1105          | 0.0135                      |
| 4    | 1      | 3      | 4          | 3     | 1       | 2       | 3           | 11024.6687          | 0.0032                      |
| 5    | 0      | 5      | 6          | 4     | 0       | 4       | 5           | 12666.1476          | -0.0006                     |
| 5    | 0      | 5      | 5          | 4     | 0       | 4       | 4           | 12666.7850          | -0.0059                     |
| 5    | 0      | 5      | 7          | 4     | 0       | 4       | 6           | 12667.9703          | 0.0010                      |
| 5    | 0      | 5      | 4          | 4     | 0       | 4       | 3           | 12668.5944          | -0.0008                     |
